# Supplementary material for: Prmt5 is required for germ cell survival during spermatogenesis in mice
Source: PubMed Central journal article supplement (PMC4466585; doi:10.1038/srep11031), 2015-06-15
Supplement: srep11031-s1.pdf [file srep11031-s1.pdf]

# *Prmt5* is required for germ cell survival during spermatogenesis in mice

Yanbo Wang<sup>1,2</sup>, Tianxiang Zhu<sup>4,1</sup>, Qiuling Li<sup>3</sup>, Chunyi Liu<sup>3</sup>, Feng Han<sup>1,2</sup>, Min Chen<sup>1,2</sup>,  
Lianjun Zhang<sup>1,2</sup>, Xiuhong Cui<sup>1</sup>, Yan Qin<sup>1,2</sup>, Shilai Bao<sup>3\*</sup>, Fei Gao<sup>1\*</sup>

<sup>1</sup>State Key Laboratory of Reproductive Biology, Institute of Zoology, Chinese Academy of Sciences, Beijing 100101, China

<sup>2</sup>University of Chinese Academy of Sciences, Beijing, China

<sup>3</sup>State Key Laboratory of Molecular and Developmental Biology, Institute of Genetics and Developmental Biology, Chinese Academy of Sciences, Beijing 100101, China

<sup>4</sup>School of Medicine, Zhejiang University, Hangzhou 310058, China

\* Correspondence to: Fei Gao, [gaof@ioz.ac.cn](mailto:gaof@ioz.ac.cn); or [slbao@genetics.ac.cn](mailto:slbao@genetics.ac.cn)

Figure S1

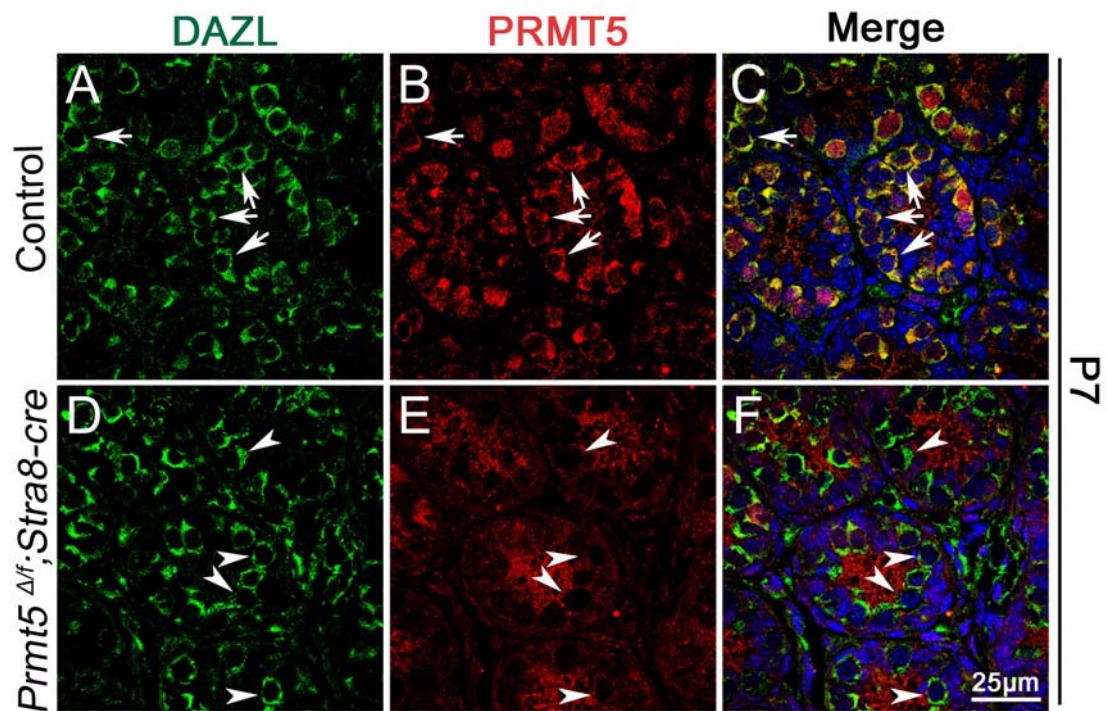

**Figure S1. Prmt5 was inactivated as early as P7 in germ cells of *Prmt5*<sup>Δ/f</sup>; *Stra8-Cre* testes.** The expression of Prmt5 (red) in control and *Prmt5*<sup>Δ/f</sup>; *Stra8-Cre* testes was examined by Immunofluorescence at P7. Germ cells were labeled with antibody against Dazl (green, white arrows). In control testes, Prmt5 was detected in cytoplasm of germ cells (B, C, white arrows), whereas no Prmt5 was detected in germ cells of *Prmt5*<sup>Δ/f</sup>; *Stra8-Cre* testes (E,F, white arrowheads).

Figure S2

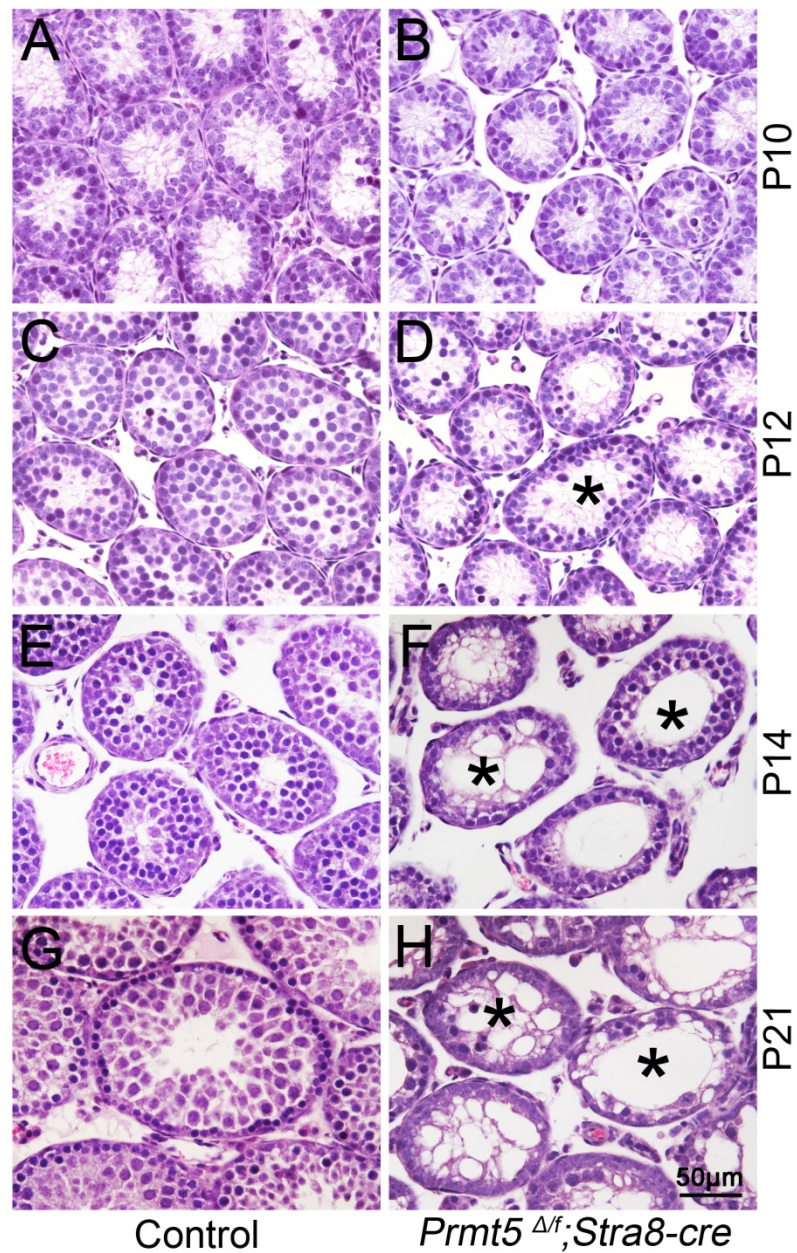

**Figure S2.** The defect of germ cell development was first observed in *Prmt5*<sup>Δf</sup>; *Stra8-Cre* mice at P12. The results of H&E staining showed that the testes from *Prmt5*<sup>Δf</sup>; *Stra8-Cre* mice (B) was grossly normal compared to control testes (A) at P10. Aberrant seminiferous tubules (asterisks) were first noted in *Prmt5*<sup>Δf</sup>; *Stra8-Cre* testes (D, asterisks) at P12, and atrophic tubules (asterisks) were observed in *Prmt5*-deficient testes at P14 (F, asterisks) and P21 (H, asterisks).

Figure S3

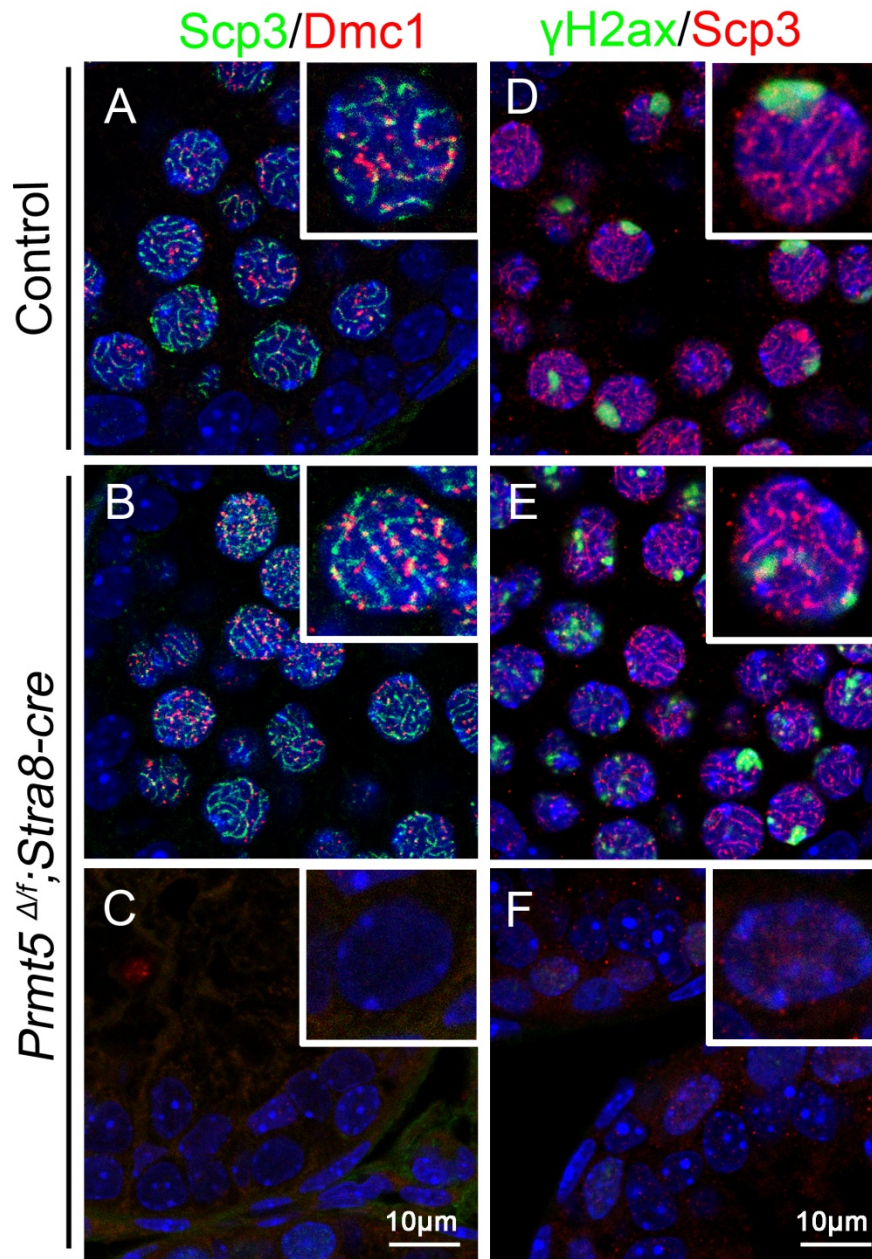

**Figure S3. Immunofluorescence of Dmc1 and  $\gamma$ H2AX.** The expression of Dmc1 and  $\gamma$ H2AX was examined by immunofluorescence. In control testes, Dmc1 protein (A, red) was detected in most of spermatocytes at P12, and co-localized with Scp3 (A, green).  $\gamma$ H2AX (green) was mainly observed in sex body (D) in control testes. In *Prmt5<sup>Δf</sup>; Stra8-Cre* testes, Dmc1 protein (B, red) was only detected in a small number of germ cells, which was co-localized with Scp3 (B, green).  $\gamma$ H2AX (green) was also detected in a small number of germ cells of *Prmt5<sup>Δf</sup>; Stra8-Cre* testes, whereas multiple foci were noted (E). Dmc1 (C) and  $\gamma$ H2AX (F) protein was absent in most of germ cells from *Prmt5<sup>Δf</sup>; Stra8-Cre* testes.

Figure S4

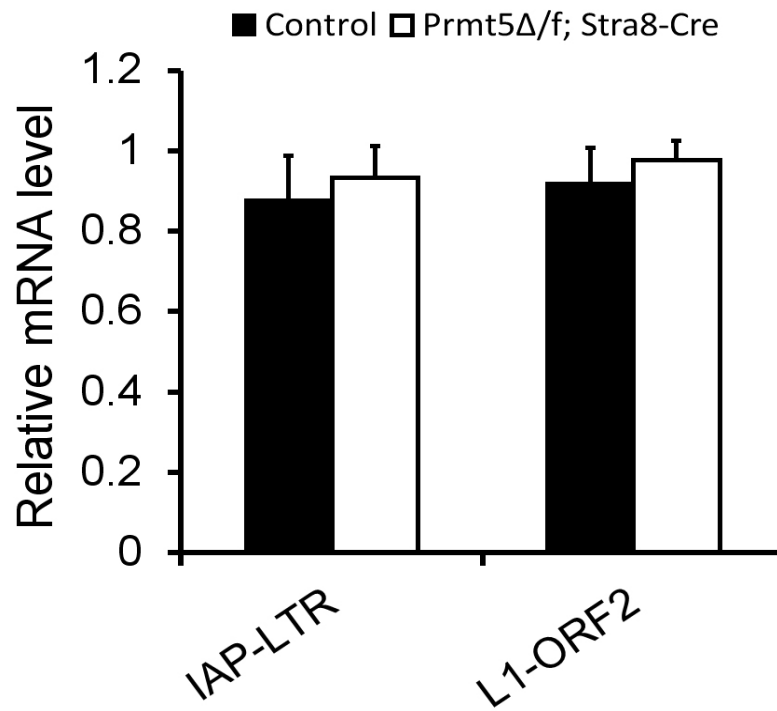

**Figure S4. Loss of *Prmt5* did not result in up-regulation of transposable elements in germ cells.** The expression of TEs in testes at P10 was examined by real-time PCR. Compared to control testes, the mRNA levels of *IAP-LTR* and *L1-ORF2* in *Prmt5* <sup>$\Delta/f$</sup> ; *Stra8-Cre* testes were not increased.

Table S1

| Gene           | Forward primer sequence     | Reverse primer sequence     |
|----------------|-----------------------------|-----------------------------|
| <i>Prmt5</i>   | TGGTGGCATAACTTTCGGACT       | TCCAAGCCAGCGGTCAAT          |
| <i>Dazl</i>    | ATGTCTGCCACAACCTCTGAG       | CTGATTTTCGGTTTCATCCATCCT    |
| <i>Vasa</i>    | CTAGGAAGACCAAATAGTGAATCTGAC | TCCAGAACCTGTTACTACTTCTTCATT |
| <i>Plzf</i>    | CCCAGTTCTCAAAGGAGGATG       | TTCCCACACAGCAGACAGAAG       |
| <i>Stra8</i>   | CTGTTGCCGGACCTCATGG         | TCACTTCATGTGCAGAGATGATG     |
| <i>Dmc1</i>    | CCCTCTGTGTGACAGCTCAAC       | GGTCAGCAATGTCCCGAAG         |
| <i>Spo11</i>   | CGTGGCCTCTAGTTCTGAGGT       | GCTCGATCTGTTGTCTATTGTGA     |
| <i>Rad51</i>   | GTCCACAGCCTATTTACGGT        | ACAGCCTCCACTGTATGGTAAC      |
| <i>Rec8</i>    | CTACCTAGCTTGCTTCTTCCCA      | GCCTCTAAAAGGTGTCGAATCTG     |
| <i>Syp3</i>    | AGAAATGTATACCAAAGCTTCTTTCAA | TTAGATAGTTTTTCTCCTTGTTCTCA  |
| <i>Syp1</i>    | AAGTTTGATTCTAAAACAACCTCCTCA | ACTCTTTTTAGTTGGTGTCTTCACTGT |
| <i>Caspas3</i> | GCTGACTTCCTGTATGCTTAC       | ATCCGTTGCCACCTTCC           |
| <i>L1-ORF2</i> | CGGGAGACAGCACATACTAGCA      | TCTCAAAGAACCAACTCCTCGT      |
| <i>IAP-LTR</i> | ACATTCGCCGCCACAAGA          | TAGTCGTAAATACCCTTGGCTCAT    |

Table S1. The primers used for real-time PCR analysis.
